# Supplementary material for: Impact of extending direct antiviral agents (DAA) availability in France: an observational cohort study (2015-2019) of data from French administrative healthcare databases (SNDS)
Source: PubMed Central journal article supplement (PMC8671622; doi:10.1016/j.lanepe.2021.100281), 2021-12-11
Supplement: mmc2.pdf [file mmc2.pdf]

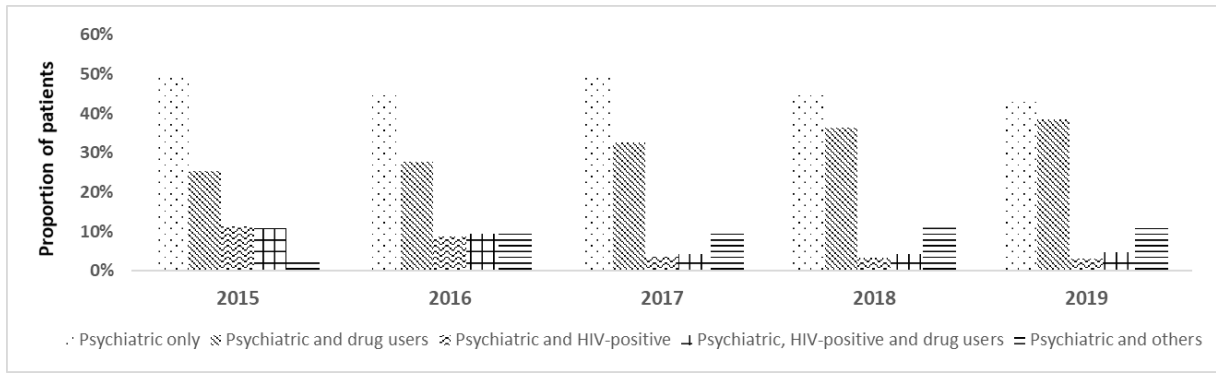

**Supplementary Figure S2. Distribution of the psychiatric subpopulation per year, 2015-2019**
