# Supplementary material for: Impact of extending direct antiviral agents (DAA) availability in France: an observational cohort study (2015-2019) of data from French administrative healthcare databases (SNDS)
Source: PubMed Central journal article supplement (PMC8671622; doi:10.1016/j.lanepe.2021.100281), 2021-12-11
Supplement: mmc3.pdf [file mmc3.pdf]

### Supplementary Table S1. Algorithms and codes used to define the at-risk-population :

The “at-risk population” was identified through the following algorithms and according to the codes given in the following Table:

- Migrants: Individuals beneficiaries of the government run plan covering aliens with an irregular status (aide médicale d'état, AME);
- Prisoners: Individuals under the prisoners health insurance regime;
- HIV+ patients: Individuals diagnosed with HIV during a hospital stay or LTD for HIV or receiving an anti-HIV treatment;
- Psychiatric patients: Individuals diagnosed with a psychotic disorder, neurotic or mood disorders, addictive disorders or mental deficiency during a hospital stay and/or receiving antidepressants or LTD for these pathologies;
- Drug users (DUs): Individuals diagnosed with dependence/use of opioid drugs during a hospital stay and/or receiving opioid substitution therapy (OST) or beneficiaries of special insurance coverage for patients with chronic diseases.

| Risk factor   | Algorithm                                                                                               | Diagnostic of hospitalization and/or LTD (ICD-10 codes)                                                                                                                                                                                                                                                                                                                                                                                                                                                                                                          | Drug (Anatomical Chemical (ATC) classification system code)                                                                                                                                                                                                                                                                                                                        | Biological test (French Medical Common Procedure Coding System)                                                                                                                                                                                                                                                                                                                                                                                 |
|---------------|---------------------------------------------------------------------------------------------------------|------------------------------------------------------------------------------------------------------------------------------------------------------------------------------------------------------------------------------------------------------------------------------------------------------------------------------------------------------------------------------------------------------------------------------------------------------------------------------------------------------------------------------------------------------------------|------------------------------------------------------------------------------------------------------------------------------------------------------------------------------------------------------------------------------------------------------------------------------------------------------------------------------------------------------------------------------------|-------------------------------------------------------------------------------------------------------------------------------------------------------------------------------------------------------------------------------------------------------------------------------------------------------------------------------------------------------------------------------------------------------------------------------------------------|
| HIV+ patients | Individuals diagnosed with HIV during a hospital stay or LTD for HIV or receiving an anti-HIV treatment | In MCO data (hospitalization of medicine, obstetric, surgery) : primary diagnosis*, related diagnosis**, significant associated diagnosis***<br>In RIM-P data (Collection of Medical Information in Psychiatry): primary diagnosis, significant associated diagnosis<br><br>B20 -B21: Human immunodeficiency virus [HIV] disease<br>F02.4: Dementia in human immunodeficiency virus [HIV] disease<br>Z20.6: Contact with and (suspected) exposure to human immunodeficiency virus [HIV]<br>Z21: Asymptomatic human immunodeficiency virus [HIV] infection status | J05AF01, J05AF02, J05AF03, J05AF04, J05AF05, J05AF06, J05AF07, J05AF09, J05AG01, J05AG03, J05AG04, J05AG05, J05AR01, J05AR02, J05AR03, J05AR04: Reverse transcriptase inhibitors<br>J05AE01, J05AE02, J05AE03, J05AE04, J05AE05, J05AE07, J05AE08, J05AE09, J05AE10, J05AR10: Protease inhibitors<br>J05AR06, J05AR08, J05AR09, J05AX07, J05AX08, J05AX09:<br>Other HIV antivirals | 0805: VIH: Genotypic resistance to antiretrovirals (Enzyme inhibitors)<br>0806: Genotypic resistance to antiretroviral drugs (Fusion inhibitors,...)<br>0388: HIV infection 1 and 2: Serodiagnosis detection<br>0389: HIV infection 1 and 2: Confirmation serodiagnosis 1 reaction<br>0390: IHIV infection 1 and 2: Confirmation serodiagnosis 2 or more reactions<br>0392: HIV infection 1 and 2: P24 antigen of HIV 1: research and titration |

| Risk factor          | Algorithm                                                                                                                                                                                                              | Diagnostic of hospitalization and/or LTD (ICD-10 codes)                                                                                                                                                                                                                                                                                                                                                                                                                                                                                                                                                                                                                                                                                                                                                                                                                                                                                                                                                                       | Drug (Anatomical Chemical (ATC) classification system code)                                                                  | Biological test (French Medical Common Procedure Coding System) |
|----------------------|------------------------------------------------------------------------------------------------------------------------------------------------------------------------------------------------------------------------|-------------------------------------------------------------------------------------------------------------------------------------------------------------------------------------------------------------------------------------------------------------------------------------------------------------------------------------------------------------------------------------------------------------------------------------------------------------------------------------------------------------------------------------------------------------------------------------------------------------------------------------------------------------------------------------------------------------------------------------------------------------------------------------------------------------------------------------------------------------------------------------------------------------------------------------------------------------------------------------------------------------------------------|------------------------------------------------------------------------------------------------------------------------------|-----------------------------------------------------------------|
| Psychiatric patients | Individuals diagnosed with a psychotic disorder, neurotic or mood disorders, addictive disorders or mental deficiency during a hospital stay and/or receiving antidepressants or LTD for these pathologies             | <p>In MCO data (hospitalization of medicine, obstetric, surgery) : primary diagnosis, related diagnosis, significant associated diagnosis</p> <p>In RIM-P data (Collection of Medical Information in Psychiatry): primary diagnosis, significant associated diagnosis</p> <p>F70-F79: Mental retardation<br/> F10-F19: Mental and behavioral disorders due to use of psychoactive substances<br/> F20-F29: Schizophrenia, schizotypal disorder and delusional disorders<br/> F30-F39: Mood disorders [emotional]<br/> F40-F48: Psychotic, stress-related and somatoform disorders<br/> F80-F89: Psychological developmental disorders<br/> F90- F98: Behavioral and emotional disorders usually appearing during childhood and adolescence<br/> F04-F09: Organic mental disorders, including symptomatic disorders<br/> F50 - F59: Behavioral syndromes associated with physiological disorders and physical conditions<br/> F60-F69: Personality and behavior disorders in adults<br/> F99: Mental disorder, unspecified</p> | N05A Antipsychotics<br>N06A Antidepressants<br>N03AG02 Valpromides<br>N03AG01 Valproic acid (Depakote only)                  | N/A                                                             |
| Drug users (DUs)     | Individuals diagnosed with dependence/use of opioid drugs during a hospital stay and/or receiving opioid substitution therapy (OST) or beneficiaries of special insurance coverage for patients with chronic diseases. | <p>In MCO data (hospitalization of medicine, obstetric, surgery) : primary diagnosis, related diagnosis, significant associated diagnosis</p> <p>In RIM-P data (Collection of Medical Information in Psychiatry): primary diagnosis, significant associated diagnosis</p> <p>In SSR data (follow-up care and rehabilitation): all diagnosis</p> <p>F11-F19: Mental and behavioral disorders due to use of psychoactive substances<br/> T40: Intoxication by narcotics and psychodysleptics [hallucinogens]<br/> Z715: Advice and monitoring for drug addiction and dependence<br/> Z722: Drug use</p>                                                                                                                                                                                                                                                                                                                                                                                                                         | N07BC01 Buprenorphine<br>N07BC02 Methadone<br>N07BB04 Naltrexone<br>N07BC51 Buprenorphine in combination<br>V03AB15 Naloxone | N/A                                                             |
| Migrants             | Individuals beneficiaries of the government run plan covering aliens with an irregular status ( <i>aide médicale d'état</i> , AME)                                                                                     | N/A                                                                                                                                                                                                                                                                                                                                                                                                                                                                                                                                                                                                                                                                                                                                                                                                                                                                                                                                                                                                                           | N/A                                                                                                                          | N/A                                                             |

| Risk factor | Algorithm                                               | Diagnostic of hospitalization and/or LTD<br>(ICD-10 codes) | Drug<br>(Anatomical Chemical (ATC)<br>classification system code) | Biological test<br>(French Medical Common<br>Procedure Coding System) |
|-------------|---------------------------------------------------------|------------------------------------------------------------|-------------------------------------------------------------------|-----------------------------------------------------------------------|
| Prisoners   | Individuals under the prisoners health insurance regime | N/A                                                        | N/A                                                               | N/A                                                                   |

\*Primary diagnosis: the health problem that motivated the patient's admission to the medical unit and established at discharge.

\*\*Related diagnosis: report on the management of the patient in association with the primary diagnosis when this is not sufficient.

\*\*\*Significant associated diagnosis: a condition, symptom or any other reason for healthcare use coexisting with the primary diagnosis, and constituting: an additional distinct health problem (another condition) or a complication of the primary condition or a complication of the treatment of the primary condition.
