# Supplementary material for: Impact of extending direct antiviral agents (DAA) availability in France: an observational cohort study (2015-2019) of data from French administrative healthcare databases (SNDS)
Source: PubMed Central journal article supplement (PMC8671622; doi:10.1016/j.lanepe.2021.100281), 2021-12-11
Supplement: mmc4.pdf [file mmc4.pdf]

**Supplementary Table S2. Quarterly duration of DAA treatment in days, 2015-2019**

| Year               | 2015-<br>Q1     | 2015-<br>Q2      | 2015-<br>Q3     | 2015-<br>Q4      | 2016-<br>Q1      | 2016-<br>Q2     | 2016-<br>Q3     | 2016-<br>Q4     | 2017-<br>Q1     | 2017-<br>Q2     | 2017-<br>Q3     | 2017-<br>Q4     | 2018-<br>Q1     | 2018-<br>Q2     | 2018-<br>Q3     | 2018-<br>Q4     | 2019-<br>Q1     | 2019-<br>Q2     | 2019-<br>Q3     | 2019-<br>Q4 |
|--------------------|-----------------|------------------|-----------------|------------------|------------------|-----------------|-----------------|-----------------|-----------------|-----------------|-----------------|-----------------|-----------------|-----------------|-----------------|-----------------|-----------------|-----------------|-----------------|-------------|
| <b>n*</b>          | 3,774           | 3,344            | 3,057           | 3,426            | 3,780            | 3,488           | 3,278           | 4,081           | 5,586           | 5,606           | 4,515           | 4,442           | 4,217           | 4,138           | 3,264           | 3,441           | 3,335           | 2,911           | 2,514           | 2,615       |
| <b>Media<br/>n</b> | 84.0            | 84.0             | 84.0            | 84.0             | 83.0)            | 83.0            | 82.0            | 82.0            | 81.0            | 80.0            | 80.0            | 81.0            | 80.0            | 72.0            | 75.0            | 76.0            | 76.0            | 76.0            | 73.0            | 52.0        |
| <b>Q1 -<br/>Q3</b> | [79.0-<br>89.0] | [79.0 -<br>87.0] | [79.0-<br>88.0] | [80.0 -<br>88.0] | [79.0 -<br>85.0] | [74.0-<br>85.0] | [66.0-<br>84.0] | [57.0-<br>84.0] | [59.0-<br>84.0] | [56.0-<br>84.0] | [56.0-<br>84.0] | [56.0-<br>84.0] | [54.0-<br>83.0] | [54.0-<br>84.0] | [54.0-<br>84.0] | [54.0-<br>83.0] | [54.0-<br>84.0] | [53.0-<br>83.0] | [28.0-<br>61.0] |             |

\* line of treatment number
