# Supplementary material for: Impact of extending direct antiviral agents (DAA) availability in France: an observational cohort study (2015-2019) of data from French administrative healthcare databases (SNDS)
Source: PubMed Central journal article supplement (PMC8671622; doi:10.1016/j.lanepe.2021.100281), 2021-12-11
Supplement: mmc5.pdf [file mmc5.pdf]

**Supplementary Table S3. Sociodemographic profile of the psychiatric population per year, 2015-2019**

|                   | <b>Year</b>   | <b>2015</b>   | <b>2016</b>   | <b>2017</b>   | <b>2018</b>   | <b>2019</b>   |
|-------------------|---------------|---------------|---------------|---------------|---------------|---------------|
| <b>Age, years</b> | <b>N</b>      | 3628          | 3791          | 4958          | 3747          | 3000          |
|                   | <b>Median</b> | 54.0          | 53.0          | 53.0          | 53.0          | 53.0          |
|                   | <b>Q1-Q3</b>  | [49.0 - 60.0] | [48.0 - 59.0] | [47.0 - 59.0] | [46.0 - 59.0] | [46.0 - 59.0] |
| <b>Males</b>      | <b>N</b>      | 2381          | 2387          | 2942          | 2310          | 1965          |
|                   | <b>(%)</b>    | (65.6)        | (63.0)        | (59.3)        | (61.6)        | (65.5)        |
