# Supplementary material for: Impact of extending direct antiviral agents (DAA) availability in France: an observational cohort study (2015-2019) of data from French administrative healthcare databases (SNDS)
Source: PubMed Central journal article supplement (PMC8671622; doi:10.1016/j.lanepe.2021.100281), 2021-12-11
Supplement: mmc6.pdf [file mmc6.pdf]

**Supplementary Table S4. Characteristics of the retreated population, 2015-2019**

|                                                      |                       | Total        |
|------------------------------------------------------|-----------------------|--------------|
|                                                      |                       | N = 2,212    |
| <b>Retreated patients*</b>                           | <b>N (%)</b>          | 2,212 (3.7)  |
| <b>Age, year</b>                                     | <b>Median [Q1-Q3]</b> | 55 [48-62]   |
| <b>Males</b>                                         | <b>N (%)</b>          | 1,557 (70.4) |
| <b>At-risk patients</b>                              | <b>N (%)</b>          | 1,163 (52.6) |
| <b>Psychiatric patients</b>                          | <b>N (%)</b>          | 634 (28.7)   |
| <b>Drug users</b>                                    | <b>N (%)</b>          | 112 (21.8)   |
| <b>HIV-positive patients</b>                         | <b>N (%)</b>          | 514 (23.2)   |
| <b>Migrants</b>                                      | <b>N (%)</b>          | 121 (5.5)    |
| <b>Prisoners</b>                                     | <b>N (%)</b>          | 483 (5.1)    |
| <b>Interval between the first and second course,</b> |                       |              |
| <b>months</b>                                        |                       |              |
| <b>[3 - 6]</b>                                       | <b>N (%)</b>          | 438 (19.8)   |
| <b>[6 - 12]</b>                                      | <b>N (%)</b>          | 704 (31.8)   |
| <b>&gt;12</b>                                        | <b>N (%)</b>          | 1,070 (48.4) |

\*among incident treated patients (N = 71,466)
